# Supplementary material
Source: PubMed Central journal article supplement (PMC2877248)
Supplement: emm-42-386-s001.pdf [file emm-42-386-s001.pdf]

## **Supplemental Data**

# **Induction of the unfolded protein response and cell death pathway in Alzheimer's disease, but not in aged Tg2576 mice**

**Jin Hwan Lee<sup>1,2,3,4\*</sup>, Sun Mi Won<sup>1,2,3\*</sup>, Jaehong Suh<sup>1,2,3</sup>, Sun Joo Son<sup>4</sup>,  
Gyeong Joon Moon<sup>1,2,3,4</sup>, Ui-Jin Park<sup>1,2,3,4</sup> and Byoung Joo Gwag<sup>1,2,3,4,5</sup>**

## **Methods**

### **Human brain tissue**

Frozen tissues from 8 cases of AD and 4 cases of age-matched control were obtained from Boston University Alzheimer's Disease Center (Dr. Ann C. Mckee). AD was diagnosed according to clinical and neuropathological criteria (Supplemental Data Table S1).

**Table S1. Case demographics**

| <b>CASE</b> | <b>GROUP</b>   | <b>Age/Sex<br/>(years)</b> | <b>PMI<br/>(h)</b> | <b>Neuropathological<br/>diagnosis</b> | <b>braak and<br/>braak stage</b> | <b>Cause of death</b>           |
|-------------|----------------|----------------------------|--------------------|----------------------------------------|----------------------------------|---------------------------------|
| <b>1</b>    | <b>Control</b> | <b>66/M</b>                | <b>8.5</b>         | <b>Normal</b>                          | <b>·</b>                         | <b>sepsis</b>                   |
| <b>2</b>    | <b>Control</b> | <b>85/M</b>                | <b>19</b>          | <b>Normal</b>                          | <b>·</b>                         | <b>sepsis</b>                   |
| <b>3</b>    | <b>Control</b> | <b>73/M</b>                | <b>17</b>          | <b>Normal</b>                          | <b>·</b>                         | <b>unknown</b>                  |
| <b>4</b>    | <b>Control</b> | <b>53/M</b>                | <b>7</b>           | <b>Normal</b>                          | <b>·</b>                         | <b>myocardial infarction</b>    |
| <b>5</b>    | <b>AD</b>      | <b>71/M</b>                | <b>14.5</b>        | <b>AD</b>                              | <b>VI</b>                        | <b>unknown</b>                  |
| <b>6</b>    | <b>AD</b>      | <b>81/M</b>                | <b>6</b>           | <b>AD</b>                              | <b>I</b>                         | <b>urosepsis</b>                |
| <b>7</b>    | <b>AD</b>      | <b>80/M</b>                | <b>8.5</b>         | <b>AD</b>                              | <b>VI</b>                        | <b>pneumonia</b>                |
| <b>8</b>    | <b>AD</b>      | <b>77/M</b>                | <b>10</b>          | <b>AD</b>                              | <b>III</b>                       | <b>pneumonia</b>                |
| <b>9</b>    | <b>AD</b>      | <b>70/M</b>                | <b>3</b>           | <b>AD</b>                              | <b>VI</b>                        | <b>urosepsis</b>                |
| <b>10</b>   | <b>AD</b>      | <b>79/M</b>                | <b>7</b>           | <b>AD</b>                              | <b>VI</b>                        | <b>carcinoma of stomach</b>     |
| <b>11</b>   | <b>AD</b>      | <b>74/M</b>                | <b>7</b>           | <b>AD</b>                              | <b>VI</b>                        | <b>congestive heart failure</b> |
| <b>12</b>   | <b>AD</b>      | <b>83/M</b>                | <b>12</b>          | <b>AD</b>                              | <b>VI</b>                        | <b>pneumonia</b>                |

**Note: PMI, postmortem interval**
